# Supplementary material
Source: PubMed Central journal article supplement (PMC7315987)
Supplement: mmc1.pdf [file mmc1.pdf]

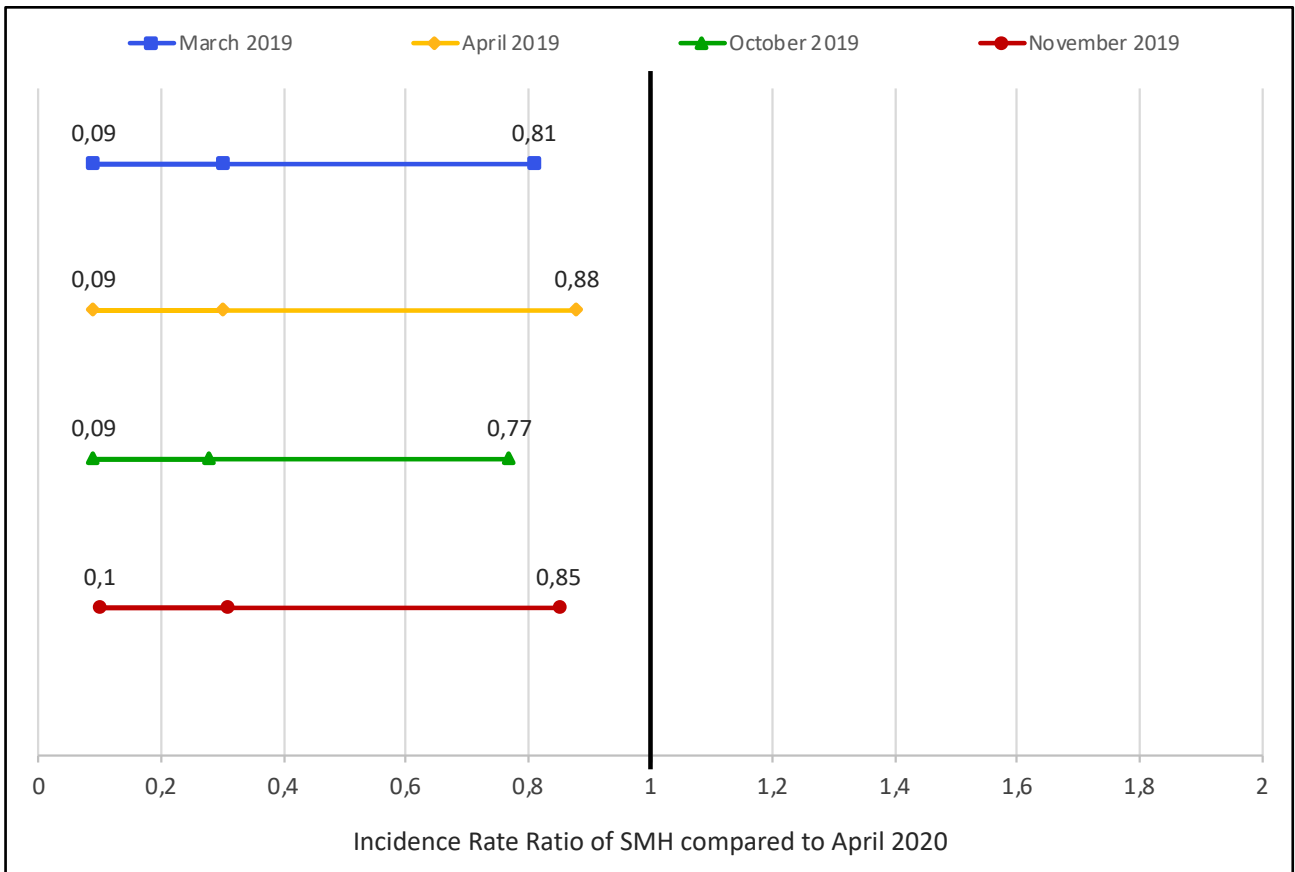

Figure 1. Forest plot showing the incidence rate ratios and 95% confidence intervals for sub-macular hemorrhages (SMH) between April 2020 and the four control months.
