# Supplementary material
Source: PubMed Central journal article supplement (PMC7315987)
Supplement: mmc2.pdf [file mmc2.pdf]

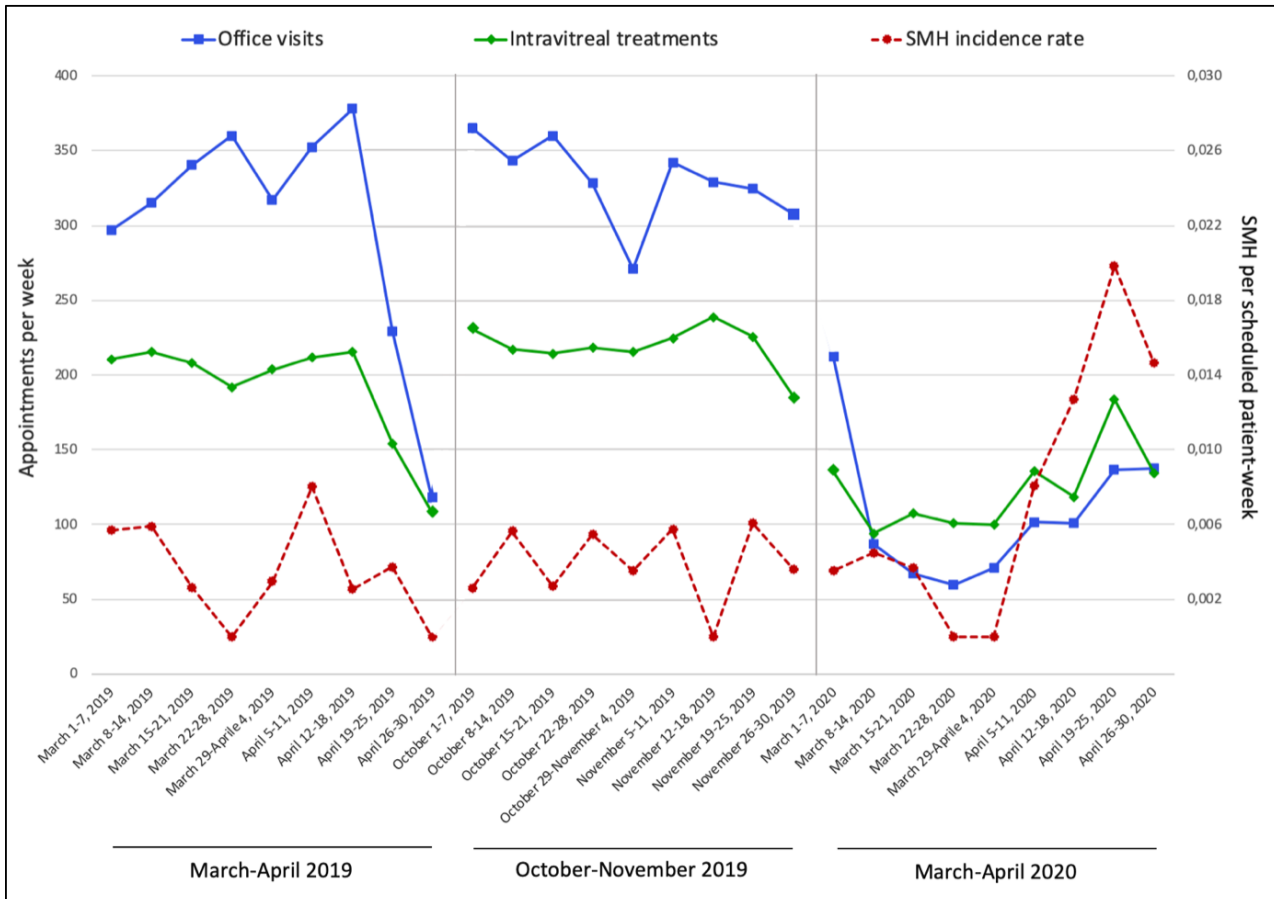

Figure 2. Combined line chart showing the significant reduction of weekly office visits and intravitreal treatments (blue and green lines, respectively) after the implementation of national lockdown (March 8, 2020). This drop was followed by a peak of sub-macular hemorrhages (SMH) per scheduled patient-week in April 2020 (red dashed line). The remarkable decrease of appointments in late April 2019 should be instead ascribed to Easter break and ARVO meeting.
